# Supplementary material for: Characteristics and interplay of esophageal microbiota in esophageal squamous cell carcinoma
Source: PubMed Central journal article supplement (PMC9229141; doi:10.1186/s12885-022-09771-2), 2022-06-24

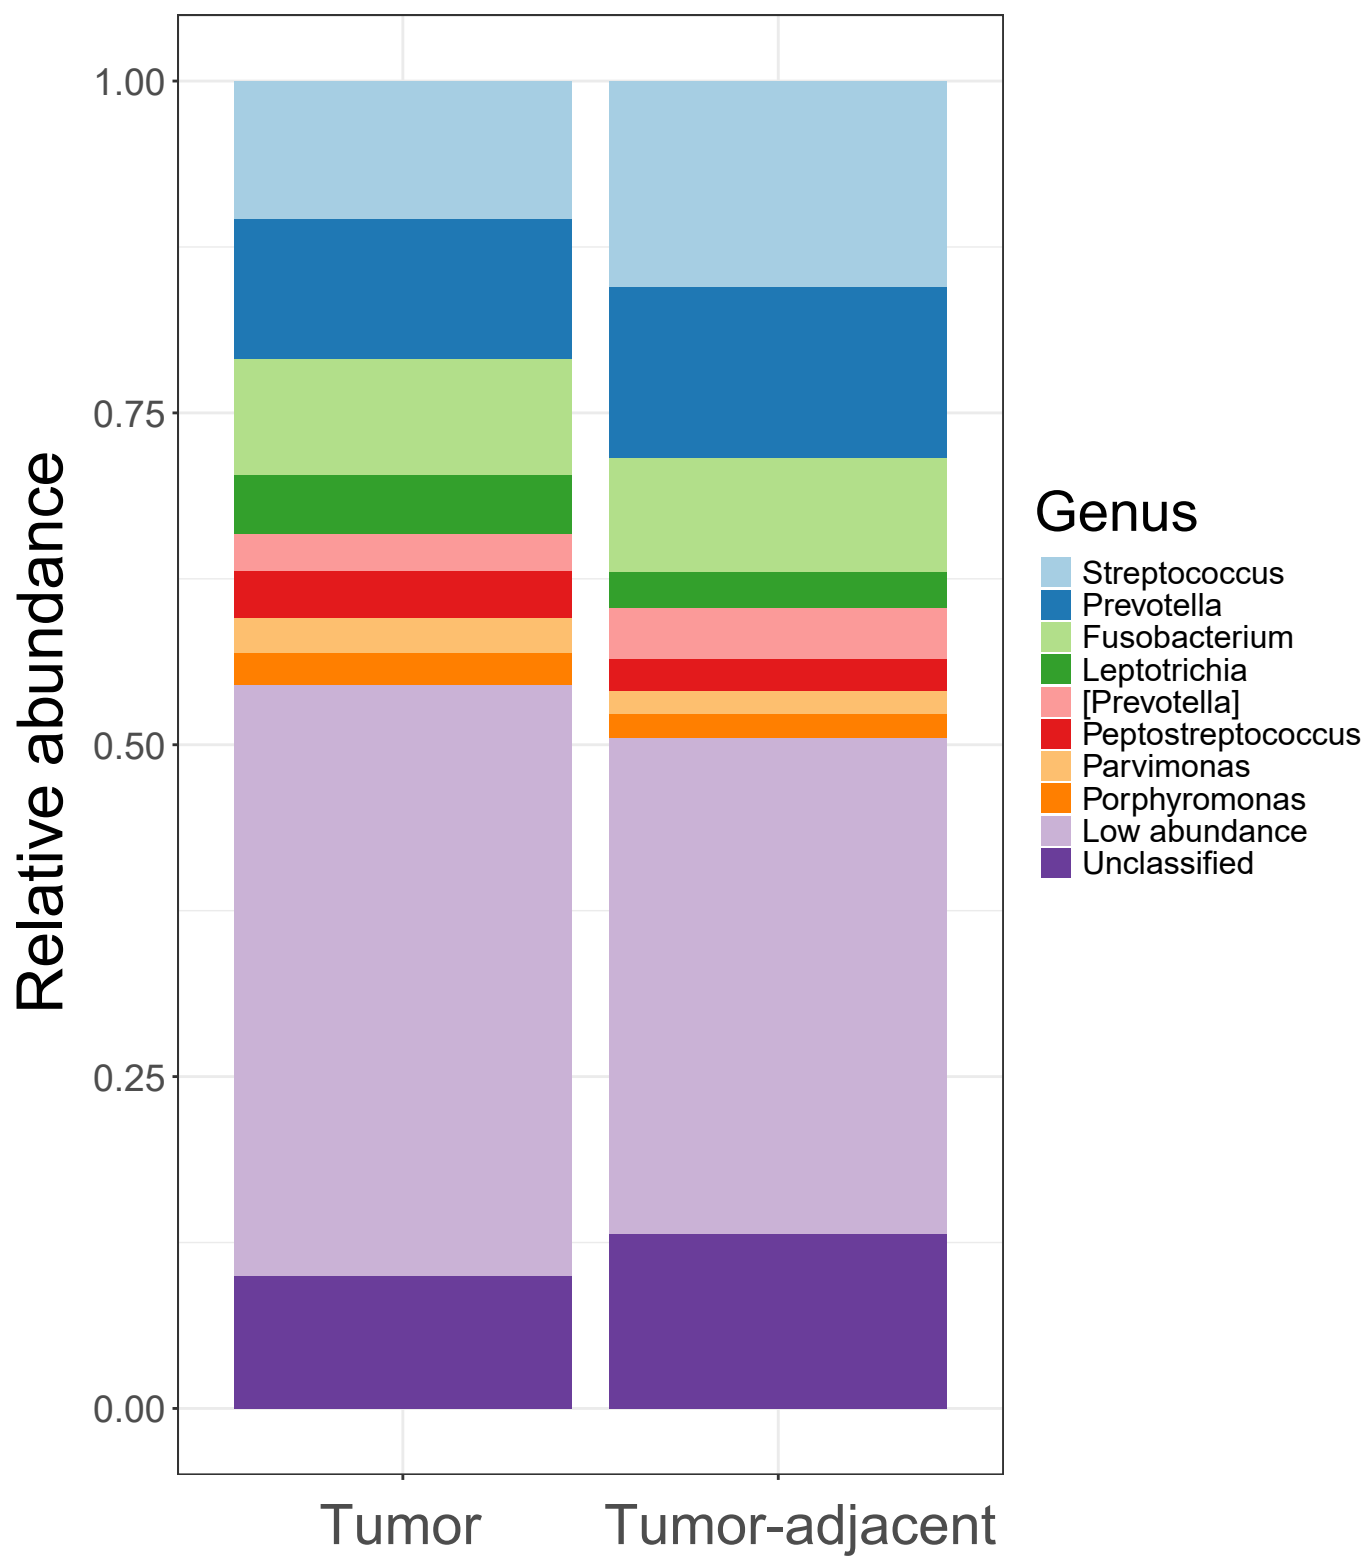

Supplement: 12885_2022_9771_MOESM7_ESM.pdf [file 12885_2022_9771_MOESM7_ESM.pdf]
